# Supplementary material
Source: PubMed Central journal article supplement (PMC7116434)
Supplement: EMS106470-supplement-Supplementary_note.pdf [file EMS106470-supplement-Supplementary_note.pdf]

## SUPPORTING INFORMATION

### **Towards a sample metadata standard in public proteomics repositories**

Yasset Perez-Riverol <sup>1,\*</sup>, European Bioinformatics Community for Mass Spectrometry

<sup>1</sup> European Molecular Biology Laboratory, European Bioinformatics Institute (EMBL-EBI), Wellcome Trust Genome Campus, Hinxton, Cambridge CB10 1SD, UK.

#### Table of Contents

Supplementary Note 1: Number of datasets in PRIDE by experiment type.

Supplementary Figure 1. PRIDE experiments by different keywords (e.g. Cross-linking, TMT). The plot shows the number of studies divided by seven major experiment types: Phosphoproteomics, crosslinking, affinity purification mass spectrometry (AP-MS, Label free, Tandem mass tag (TMT), Stable isotope labeling by amino acids in cell culture (SILAC), SAWTH proteomics.

## Supplementary Note 1: Number of datasets in PRIDE by experiment type

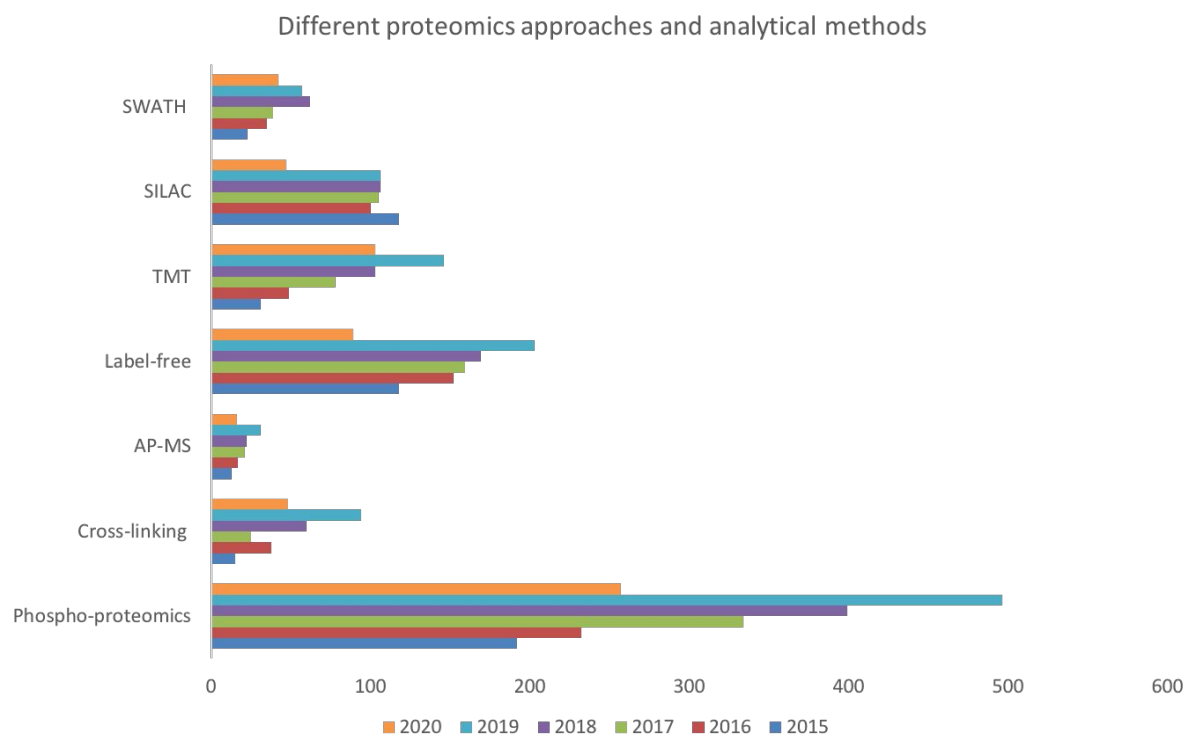

**Supplementary Figure 1:** PRIDE experiments by different keywords (e.g. Cross-linking. TMT). The plot shows the number of studies divided by seven major experiment types: Phosphoproteomics, crosslinking, affinity purification mass spectrometry (AP-MS, Label free, Tandem mass tag (TMT), Stable isotope labeling by amino acids in cell culture (SILAC), SAWTH proteomics.
